# Supplementary material for: Bimetallic selenide Cu4Mo6Se8 nanosheet arrays grown on a carbon skeleton via MOF-derived with enhanced electrochemical kinetics for high-performance sodium-ion batteries
Source: Royal Society of Chemistry journal article supplement (doi:10.1039/d3ta00265a), 2023-01-01
Supplement: d3ta00265a1.pdf [file d3ta00265a1.pdf]

## Electronic Supplementary Information

### Bimetallic Selenide $\text{Cu}_4\text{Mo}_6\text{Se}_8$ Nanosheet Arrays Grown on Carbon Skeleton via MOF-Derived with Enhanced Electrochemical Kinetics for High-Performance Sodium-Ion Batteries

Shuai Wang, Rujia Zou,\*<sup>a</sup> Qian Liu<sup>a,b</sup> and Huifang Chen\*<sup>a</sup>

a. State Key Laboratory for Modification of Chemical Fibers and Polymer Materials, College of Materials Science and Engineering, Donghua University, Shanghai 201620, P. R. China. E-mail: rjzou@dhu.edu.cn; hfchen@dhu.edu.cn

b. College of Science, Donghua University, Shanghai 201620, P. R. China

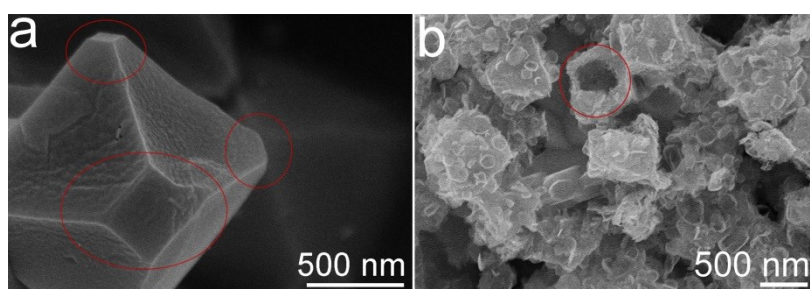

Fig. S1 (a) SEM image of Cu-Mo BMOF. (b) SEM image of CMSe/C composites.

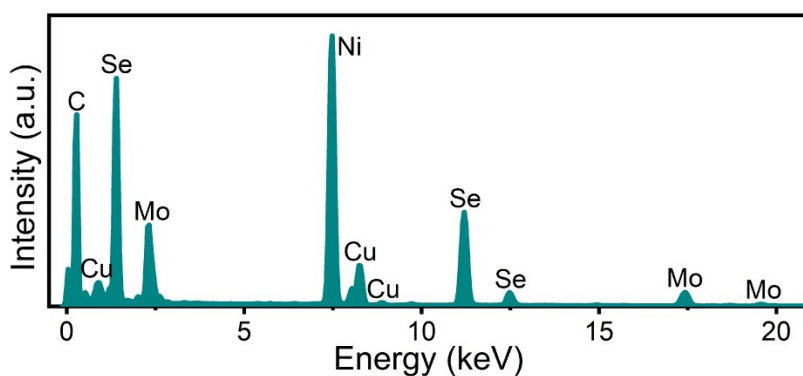

Fig. S2 EDS spectrum of CMSe/C composites.

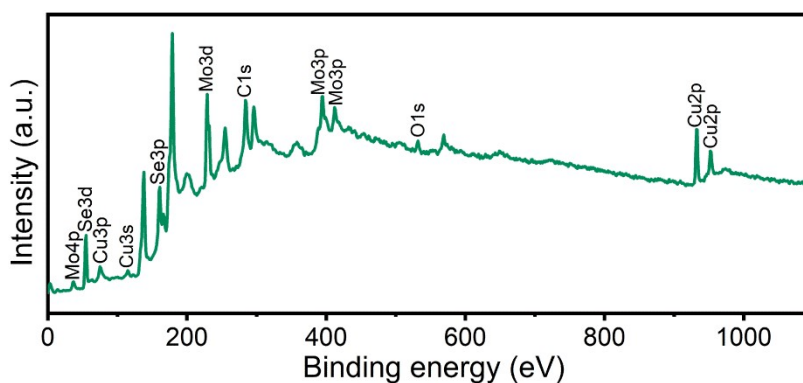

Fig. S3 The XPS survey spectrum of CMSe/C composites.

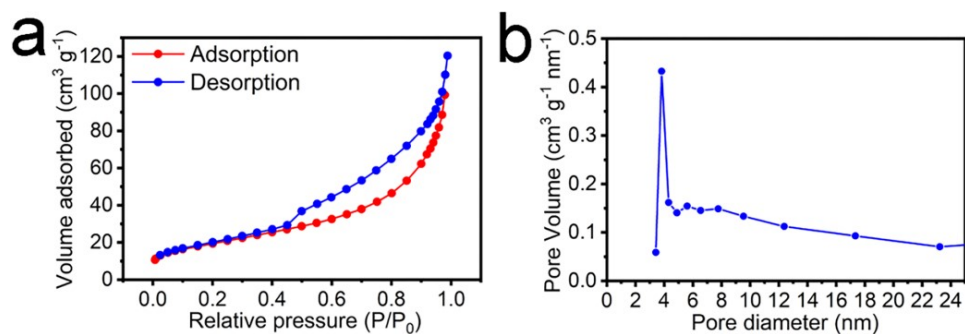

Fig. S4 (a) BET isotherm plots and (b) corresponding BJH pore size distributions of CMSe/C composites.

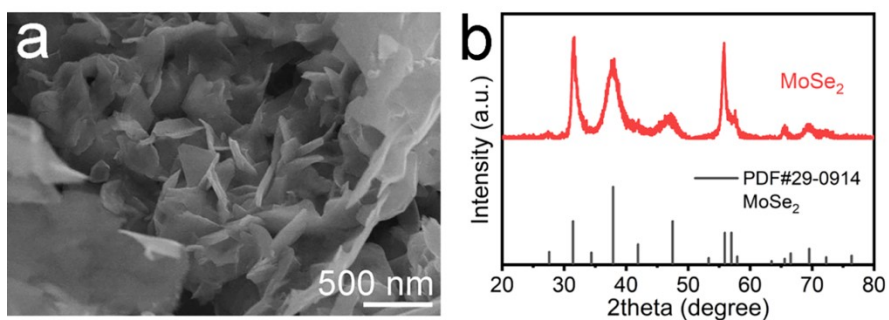

Fig. S5 (a) SEM image of pure  $\text{MoSe}_2$  nanosheets. (b) XRD pattern of the pure  $\text{MoSe}_2$ .

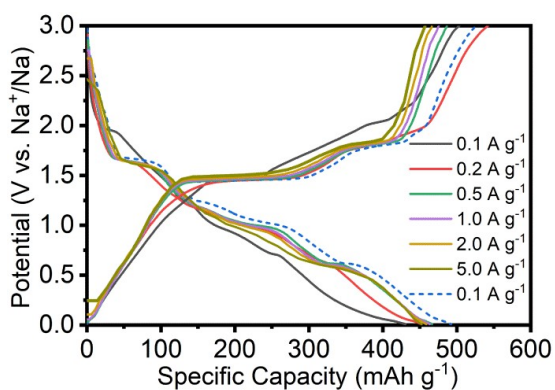

Fig. S6 Galvanostatic charge/discharge curves of CMSe/C electrode at different current densities.

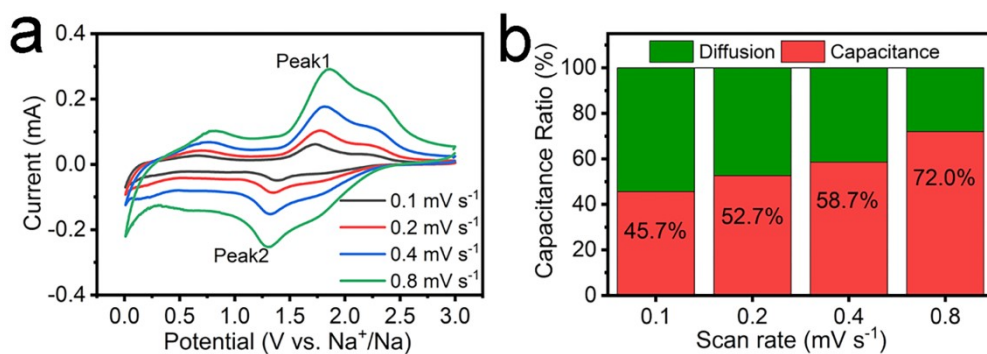

Fig. S7 (a) CV curves and (b) the capacitance contribution ratios of the  $\text{MoSe}_2$  electrode at various scan rates.

Table S1 ICE of various metal selenide composites applied as anode for SIBs reported in the previous literature.

| Materials                                                           | ICE    | Current Density       | Ref.      |
|---------------------------------------------------------------------|--------|-----------------------|-----------|
| SnSe <sub>2</sub> /ZnSe@PDA                                         | 71.6 % | 0.1 A g <sup>-1</sup> | 1         |
| CoSe <sub>2</sub> @BCN-750                                          | 68.5 % | 0.1 A g <sup>-1</sup> | 2         |
| CoSe <sub>2</sub> @C NC                                             | 71.4 % | 0.1 A g <sup>-1</sup> | 3         |
| CNT/FeSe <sub>2</sub> /C                                            | 71.5 % | 0.1 A g <sup>-1</sup> | 4         |
| CoSe <sub>2</sub> @NC-NR/CNT                                        | 65.8 % | 0.1 A g <sup>-1</sup> | 5         |
| Ni <sub>1.8</sub> Co <sub>1.2</sub> Se <sub>4</sub> @NDDC           | 68.0 % | 0.1 A g <sup>-1</sup> | 6         |
| MoSe <sub>2</sub> /N-PCD                                            | 70.4 % | 0.2 A g <sup>-1</sup> | 7         |
| NiCo <sub>2</sub> Se <sub>4</sub> /f-Ti <sub>3</sub> C <sub>2</sub> | 77.8 % | 0.5 A g <sup>-1</sup> | 8         |
| CoSe <sub>2</sub> /(NiCo)Se <sub>2</sub>                            | 79.6 % | 0.2 A g <sup>-1</sup> | 9         |
| FeCo-Se@NC                                                          | 68.7 % | 0.5 A g <sup>-1</sup> | 10        |
| a-SnSe/rGO                                                          | 70.0 % | 0.1 A g <sup>-1</sup> | 11        |
| Co <sub>0.85</sub> Se-Fe <sub>7</sub> Se <sub>8</sub> @rGO          | 79.4 % | 0.1 A g <sup>-1</sup> | 12        |
| ZnSe@C@rGO                                                          | 68.1 % | 0.1 A g <sup>-1</sup> | 13        |
| SnSe <sub>2</sub> /FeSe <sub>2</sub> @NC                            | 72.5 % | 0.2 A g <sup>-1</sup> | 14        |
| Cu <sub>4</sub> Mo <sub>6</sub> Se <sub>8</sub> /C                  | 80.5 % | 0.5 A g <sup>-1</sup> | This Work |

Table S2 The cycle performance of Mo-based or Cu-based selenide electrodes in SIBs.

| Materials             | Cycle Performance                             | Current Density       | Ref. |
|-----------------------|-----------------------------------------------|-----------------------|------|
| Cu <sub>2</sub> Se    | 256 mAh g <sup>-1</sup><br>after 1000 cycles  | 1.0 A g <sup>-1</sup> | 15   |
| MoSe <sub>2</sub> /CN | 328.7 mAh g <sup>-1</sup><br>after 500 cycles | 1.0 A g <sup>-1</sup> | 16   |

|                                                     |                                                |                       |           |
|-----------------------------------------------------|------------------------------------------------|-----------------------|-----------|
| <b>Cu<sub>2</sub>Se</b>                             | 308 mAh g <sup>-1</sup><br>after 50th cycles   | 0.1 A g <sup>-1</sup> | 17        |
| <b>P-MoSe<sub>2</sub>/N-CNT NF</b>                  | 372 mAh g <sup>-1</sup><br>after 300 cycles    | 0.2 A g <sup>-1</sup> | 18        |
| <b>MoSe<sub>2</sub>/N-PCD</b>                       | 223 mAh g <sup>-1</sup><br>after 1000 cycles   | 2.0 A g <sup>-1</sup> | 7         |
| <b>MoS<sub>2</sub>/N,P-rGO</b>                      | 236.6 mAh g <sup>-1</sup><br>after 7000 cycles | 2.0 A g <sup>-1</sup> | 19        |
| <b>MoSe<sub>2</sub>@NPC/rGO</b>                     | 340 mAh g <sup>-1</sup><br>after 500 cycles    | 0.5 A g <sup>-1</sup> | 20        |
| <b>Cu<sub>4</sub>Mo<sub>6</sub>Se<sub>8</sub>/C</b> | 474 mAh g <sup>-1</sup><br>after 2400 cycles   | 2.0 A g <sup>-1</sup> | This Work |

## References

- 1 P. Liu, J. Han, K. J. Zhu, Z. H. Dong and L. F. Jiao, *Adv. Energy Mater.*, 2020, **10**, 2000741.
- 2 H. Tabassum, C. X. Zhi, T. Hussain, T. J. Qiu, W. Aftab and R. Q. Zou, *Adv. Energy Mater.*, 2019, **9**, 1901778.
- 3 B. Q. Li, Y. Liu, X. Jin, S. H. Jiao, G. R. Wang, B. Peng, S. Y. Zeng, L. Shi, J. M. Li and G. Q. Zhang, *Small*, 2019, **15**, 1902881.
- 4 M. Yousaf, Z. P. Wang, Y. S. Wang, Y. J. Chen, U. Ali, M. Maqbool, A. Imran, N. Mahmood, P. Gao and R. P. S. Han, *Small*, 2020, **16**, 2002200.
- 5 S. K. Park and Y. C. Kang, *ACS Appl. Mater. Interfaces*, 2018, **10**, 17203-17213.
- 6 B. H. Hou, Y. Y. Wang, D. S. Liu, Z. Y. Gu, X. Feng, H. S. Fan, T. F. Zhang, C. L. Lu and X. L. Wu, *Adv. Funct. Mater.*, 2018, **28**, 1805444.
- 7 X. C. Xie, K. J. Huang, X. Wu, N. Wu, Y. Y. Xu, S. K. Zhang and C. H. Zhang, *Carbon*, 2020, **169**, 1-8.
- 8 P. F. Huang, S. L. Zhang, H. J. Ying, Z. Zhang and W. Q. Han, *Chem. Eng. J.*, 2021, **417**, 129161.
- 9 S. K. Park, J. K. Kim and Y. C. Kang, *J. Mater. Chem. A*, 2017, **5**, 18823-18830.
- 10 P. J. Wang, J. J. Huang, J. Zhang, L. Wang, P. H. Sun, Y. F. Yang and Z. J. Yao, *J. Mater. Chem. A*, 2021, **9**, 7248-7256.
- 11 M. S. Wang, A. M. Peng, H. Xu, Z. L. Yang, L. Zhang, J. Zhang, H. Yang, J. C. Chen, Y. Huang and X. Li, *J. Power Sources*, 2020, **469**, 228414.
- 12 H. Wu, R. L. Yuan, M. J. Li, L. Liu, Y. H. Liu, Q. Song, W. Ai, H. F. Du, Z. Z. Du and K. Wang,

- Carbon*, 2022, **198**, 171-178.
- 13 S. Men, H. Zheng, D. J. Ma, X. L. Huang and X. W. Kang, *J. Energy Chem.*, 2021, **54**, 124-130.
  - 14 X. Y. Gao, Y. X. Kuai, Z. X. Xu, Y. J. Cao, N. Wang, S. I. Hirano, Y. N. Nuli, J. L. Wang and J. Yang, *Small Methods*, 2021, **5**, 2100437.
  - 15 L. Y. Shao, S. G. Wang, J. P. Qi, Z. P. Sun, X. Y. Shi, Y. S. Shi and X. Lu, *Mater. Today Phys.*, 2021, **19**, 100422.
  - 16 F. H. Zheng, W. T. Zhong, Q. Deng, Q. C. Pan, X. Ou, Y. Z. Liu, X. H. Xiong, C. H. Yang, Y. Chen and M. L. Lite, *Chem. Eng. J.*, 2019, **357**, 226-236.
  - 17 T. Nagaura, J. L. Li, J. F. S. Fernando, A. Ashok, A. Alowasheer, A. K. Nanjundan, S. Lee, D. V. Golberg, J. Na and Y. Yamauchi, *Small*, 2022, **18**, 2106629.
  - 18 Y. H. Seon, Y. C. Kang and J. S. Cho, *Chem. Eng. J.*, 2021, **425**, 129051.
  - 19 G. Y. Ma, Y. L. Zhou, Y. Y. Wang, Z. Y. Feng and J. Yang, *Nano Res.*, 2021, **14**, 3523-3530.
  - 20 J. X. Wu, J. F. Yu, J. P. Liu, J. Cui, S. S. Yao, M. Ihsan-UI Haq, N. Mubarak, A. Susca, F. Ciucci and J. K. Kim, *J. Power Sources*, 2020, **476**, 228660.
